# Supplementary material
Source: PubMed Central journal article supplement (PMC11002966)
Supplement: NIHMS1981627-supplement-Supplementary_Appendix1.pdf [file NIHMS1981627-supplement-Supplementary_Appendix1.pdf]

## Medical Student Interview Guide

### Introduction:

Hello, my name is Katherine Ujunwa. I am the Research Assistant working on the “Incorporating Team-Based Learning and Evidence-Based Active Learning Principles into Pre-Clinical Medical Education” project led by Dr. Spicer. The goal for this interview is to evaluate your knowledge and application of the evidence-based strategies presented to you in Prologue II. You are being asked to participate in this interview because you recently completed Prologue II in the Fall.

The interview will last for about 60 minutes. Your participation is voluntary, and you do not have to answer any question you do not want to. Additionally, the interview can be stopped any time you like.

I am going to keep my video on to help this interview feel more conversational. If you are in a location where you can turn your video on, then please do. I would like to record this interview so that I do not miss anything, but only the audio of the call will be retained. I will also be taking notes, but I assure you that all the information will stay within the research team, and your name will not be linked to this interview. Additionally, the transcripts will be de-identified before any medical school faculty see them. Do you have any questions? Would you like to participate in this interview? Do I have your permission to record this conversation?

### Questions:

1. What were your study habits like in medical school modules prior to Prologue II?
  - Describe how you approached studying a new topic.
  - What did that look like?
  - How much time did you spend on a daily basis studying that content?
  - What resources did you use?
  - How did you use those resources?
2. Did your study habits change during Prologue II? How?
3. Did you use the instructor-provided lecture outlines?
  - (If no) – Why not?
  - (If yes) –
    - i. Describe how you used them. (probes: when did you fill them out; from memory vs while looking at materials; how long did they take to complete; what did you do after you completed them?)
    - ii. How do you think they impacted your learning?
4. Did you use the instructor-provided Anki cards? How did you use them?
  - (If no) – Why not? Did you use other Anki cards/decks?
  - (If yes) –
    - i. Describe how you used them. (when, how often/long, for what purpose, mixing up subjects – are you incorporating previous weeks’ material?)

- ii. How do you think they impacted your learning?
5. Did you use the instructor-provided self-assessment multiple-choice quizzes?
  - (If no) – Why not?
  - (If yes) –
    - i. Describe how you used them. (when, how often, for what purpose – test yourself vs for studying)
    - ii. How do you think they impacted your learning?
6. How did your studying change the week of the exam?
  - Which resources did you prioritize?
  - Why did you make that shift?
7. If we decided to continue only one of these instructor-provided learning activities next year, which one would you recommend we continue doing? Why?
8. What other materials did you use to study for the Prologue II module?
  - Why did you choose those materials?
  - What did you use them for?
  - Did you find them helpful for your learning?
9. Did you attend or watch lectures synchronously/in-real time on the day they were given? Why/why not? (Probes for “why not”: what can module directors do to improve this?)
10. How helpful were the team-based learning exercises for learning the course material?
  - What factors made them effective/ineffective?
  - What did you enjoy about them?
  - How can they improve?
11. If a medical student asked you to give them advice on the best way to structure their studying for the Prologue II module, what would you tell them? (Probes: resources, study methods, lecture attendance, timing/frequency of studying)
12. How did your experience in the Prologue II module impact your studying for subsequent medical school modules?
13. What recommendations do you have for the module directors/admin?
14. Is there anything else that you want to add?
